# Supplementary material
Source: PubMed Central journal article supplement (PMC4247857)
Supplement: NIHMS225208-supplement-supporting_information.pdf [file NIHMS225208-supplement-supporting_information.pdf]

## Supplemental Information

### Subject Recruitment

Information about patients recruited through the AC was collected on a brief case report form that included demographic and medical-history information for each child participant, including specific ASD diagnosis (autism, PDD-NOS, Asperger syndrome, Rett disorder, or childhood disintegrative disorder) and secondary diagnoses (MR, developmental delay, seizures, and dysmorphic features). Genetic test results were provided to each family by a physician or genetic counselor, and follow-up referrals for evaluations, clinical care, or parental testing were made as appropriate, in accordance with the current practice of each clinic. If a child participant was identified with a genetic abnormality and parental testing was recommended, the parent provided written consent for participation. Results of the genetic testing were obtained from the participant's medical record.

Deidentified genetic test results and demographic and medical-history information from the case report form were entered into a password-protected secure database: the AC Clinical Genetics Registry. The registry was approved by the Massachusetts General Hospital institutional review board and housed on a server at Massachusetts General Hospital. Access to the registry by participating hospitals was provided through a password-protected Web-based application.

### Agilent Chromosomal Microarray Methods

The Agilent oligonucleotide array comparative genomic hybridization (CGH) platform was evaluated previously at the DNA diagnostic laboratory at Children's Hospital Boston.<sup>1</sup> The array CGH was performed according to the man-

ufacturer's oligonucleotide array-based CGH for genomic DNA analysis protocol version 3 (Agilent Technologies, Palo Alto, CA). Briefly, 3  $\mu\text{g}$  of DNA (both test and control samples) were double-digested with AluI and RsaI and subsequently purified with QIAprep Spin Miniprep kit (Qiagen GmbH, Hilden, Germany). Digested samples were labeled with Cy3-dUTP or Cy5-dUTP (Amersham Bioscience, Little Chalfont, United Kingdom) by using the Bioprime array CGH DNA-labeling system (Invitrogen Life Technologies, Carlsbad, CA); paired samples were mixed and subsequently purified by MicroCon YM-30 (Millipore, Billerica, MA). Labeled probes were mixed with Cot-1 DNA (Invitrogen Life Technologies), blocking solution and hybridization solution (Agilent Technologies), and hybridized a 244,000 human oligo chip (G244B [Agilent Technologies]). Hybridizations were performed in a 65°C oven on a rotating rack for 40 hours. Arrays were washed with wash 1 and 2 solutions (Agilent Technologies) and scanned immediately by using the Agilent scanner. Data were analyzed by using CGH Analytics or DNA Analytics software (Agilent Technologies).

### Affymetrix 500K Assay Methods

Blood samples were received and processed at the Center for Human Genetics, Boston University School of Medicine. Genomic DNA was extracted by using the Autopure automated DNA extractor (Gentra Systems, Minneapolis, MN) according to manufacturer instructions.

Briefly, the 500K assay (Affymetrix, Santa Clara, CA) is two 250K arrays consisting of an Nspl (New England BioLabs, Beverly, MA) digest and an Styl (New England BioLabs) digest.

Genomic DNA (50 ng/ $\mu\text{L}$ ) is digested for the restriction enzymes separately. Each restriction digest is then ligated with enzyme-specific adaptors. Using the adaptors as universal sequences, the samples are subjected to polymerase chain reaction to amplify the restriction fragments and generate products between 200 bp and 2 kb. The polymerase-chain-reaction products are purified and fragmented to give products in the 20- to 200-bp size range. The products are then labeled with a labeling reagent and hybridized overnight separately onto a 250K Nspl array and a 250K Styl array. The arrays are then stained with streptavidin, and the signal is amplified with a biotinylated antibody. The arrays are then placed into the GeneChip scanner (Affymetrix), where each of the 250K spots on the array is interrogated.

### Affymetrix 500K Data Analysis

Copy-number analysis is performed by using the Affymetrix GeneChip Genotyping Analysis software. The arrays are first analyzed in a batch analysis program to determine the genotype call rate, then analyzed with Bayesian RLMM (BRLMM). Once this is finished, the arrays are analyzed with CNAT4 (Copy Number Analysis Tool) Batch Analysis for copy number. This program combines the two 250K arrays into a single virtual chip that can be viewed for copy number. The arrays are compared against a reference set of 25 previously defined normal Hapmap samples. The single-nucleotide polymorphism (SNP) results are then displayed across the chromosomes. Changes in copy number are readily visible on the display. Amplifications/deletions greater than 100 kb are reported. By using the UCSC Genome Browser (Santa Clara, CA) assembly,

any genes in these regions that have copy-number changes are reported.

### Affymetrix 5.0 Assay Methods

The SNP Array 5.0 is a single microarray featuring all SNPs from the original 2-chip mapping 500K array set, as well as 420,000 additional nonpolymorphic probes that can measure other genetic differences, such as copy-number variation. This assay now combines the Nspl and Styl fractions previously assayed on 2 separate arrays. The steps are the same as for the 500K assay.

### Affymetrix 5.0 Data Analysis

Copy-number analysis is performed by using the copy-number feature of Partek Genomic Suite software (St Louis, MO). The arrays are analyzed to determine the genotype call rate. Once this is finished the arrays are analyzed with the copy-number feature. The arrays are compared against a reference set of 25 previously defined normal Hapmap samples. The SNP results are then displayed across the chromosomes. Changes in copy number are readily visible on the display. Amplifications/deletions greater than 100 kb

are reported. By using the UCSC Genome Browser assembly, any genes in these regions that have copy-number changes are reported.

### Clinical Interpretation of Chromosomal Microarray Data

Identification of novel variants is common in CMA testing, and more common with whole genome arrays. Dozens of CNVs are present in every human genome,<sup>2-4</sup> and the clinical significance of many CNVs is poorly understood. Information about CNV locations and clinical correlations is cataloged in several public databases, such as the Database of Genomic Variants (<http://projects.tcag.ca/variation>) and DECIPHER (Database of Chromosomal Imbalance and Phenotype in Humans Using Ensembl Resources) ([www.sanger.ac.uk/PostGenomics/decipher](http://www.sanger.ac.uk/PostGenomics/decipher)), which incorporates a suite of tools designed to aid the interpretation of submicroscopic chromosomal imbalance, inversions, and translocations, as reviewed elsewhere.<sup>5,6</sup>

CNV interpretation has been addressed in published guidelines.<sup>7,8</sup> A common approach to the interpretation of VUS involves offering similar

testing for the parents to determine if the variant is new or de novo. The presence of similar variation in a parent may lead to a conclusion that identified variants are benign or pathogenic depending on the presence of similar clinical symptoms in a parent. Other clues to pathogenicity include the gene content of genomic variants. Variants including known disease genes are more likely to explain a clinical phenotype. Even if a variant contains a known gene, the type of CNV may affect pathogenicity. Deletions are generally considered more pathogenic than duplication, although this is not a universal rule.

The size of genomic variants also influences pathogenicity, although many relatively large CNVs variants (>500 kb) are familial, and many relatively small CNVs (<500 kb) are pathogenic. A majority of CNVs detected on high-resolution oligonucleotide platforms are less than 150 kb,<sup>4,9,10</sup> and detection of these CNVs complicates clinical interpretation. Overall, each of these factors must be considered before rendering a clinical interpretation of genomic CNVs, as reviewed in greater detail elsewhere.

## REFERENCES

1. Shen Y, Irons M, Miller DT, et al. Development of a focused oligonucleotide-array comparative genomic hybridization chip for clinical diagnosis of genomic imbalance. *Clin Chem*. 2007;53(12):2051-2059
2. Iafrate AJ, Feuk L, Rivera MN, et al. Detection of large-scale variation in the human genome. *Nat Genet*. 2004;36(9):949-951
3. Eichler EE. Widening the spectrum of human genetic variation. *Nat Genet*. 2006;38(1):9-11
4. Itsara A, Cooper GM, Baker C, et al. Population analysis of large copy number variants and hotspots of human genetic disease. *Am J Hum Genet*. 2009;84(2):148-161
5. Van Vooren S, Coessens B, De Moor B, Moreau Y, Vermeesch JR. Array comparative genomic hybridization and computational genome annotation in constitutional cytogenetics: suggesting candidate genes for novel submicroscopic chromosomal imbalance syndromes. *Genet Med*. 2007;9(9):642-649
6. Firth HV, Richards SM, Bevan AP, et al. DECIPHER: Database of Chromosomal Imbalance and Phenotype in Humans Using Ensembl Resources. *Am J Hum Genet*. 2009;84(4):524-533
7. Manning M, Hudgins L. Use of array-based technology in the practice of medical genetics. *Genet Med*. 2007;9(9):650-653
8. Shaffer LG, Beaudet AL, Brothman AR, et al. Microarray analysis for constitutional cytogenetic abnormalities. *Genet Med*. 2007;9(9):654-662
9. Redon R, Ishikawa S, Fitch KR, et al. Global variation in copy number in the human genome. *Nature*. 2006;444(7118):444-454
10. Komura D, Shen F, Ishikawa S, et al. Genome-wide detection of human copy number variations using high-density DNA oligonucleotide arrays. *Genome Res*. 2006;16(12):1575-1584
11. Lee C, Iafrate AJ, Brothman AR. Copy number variations and clinical cytogenetic diagnosis of constitutional disorders. *Nat Genet*. 2007;39(7 suppl):S48-S54

**SUPPLEMENTAL TABLE 1** Variants of Unknown Significance

| Chromosome Locus | Type of Change | Size, kb | Coordinates (hg18)  |
|------------------|----------------|----------|---------------------|
| 1p13.1           | Duplication    | 1148     | 115929481–117077952 |
| 1p31.1           | Duplication    | 98       | 70545751–70643192   |
| 1p31.3           | Duplication    | 80       | 65627570–65707722   |
| 1p32.1           | Deletion       | 43       | 59818945–59861885   |
| 1p34.1           | Duplication    | 277      | 45938177–46214819   |
| 1p35.3           | Duplication    | 59       | 28071072–28130320   |
| 1q21.2           | Duplication    | 30       | 149369522–149399354 |
| 1q21.3           | Deletion       | 26       | 150643431–150669253 |
| 1q22             | Duplication    | 105      | 152335528–152441362 |
| 1q23.2           | Duplication    | 30       | 158378189–158408096 |
| 1q23.2           | Deletion       | 69       | 158296040–158365328 |
| 1q23.3           | Duplication    | 67       | 158305161–158372610 |
| 1q31.3           | Deletion       | 77       | 193480150–193556851 |
| 1q32.1           | Duplication    | 36       | 201519752–201556008 |
| 1q41             | Deletion       | 174      | 214006564–214180878 |
| 1q43             | Duplication    | 172      | 234677569–234849353 |
| 2p16.3           | Deletion       | 48       | 48642925–48690613   |
| 2p21             | Duplication    | 561      | 45263776–45824967   |
| 2p21             | Deletion       | 111      | 45142805–45253772   |
| 2p23.3           | Duplication    | 222      | 25010389–25232114   |
| 2p23.3           | Deletion       | 123      | 26526964–26650410   |
| 2p25.1           | Duplication    | 43       | 10443953–10486678   |
| 2q12.3           | Duplication    | 192      | 107182927–107374708 |
| 2q14.2           | Duplication    | 128      | 119883078–120010945 |
| 2q34             | Duplication    | 2418     | 209120272–211538263 |
| 3p25.2           | Duplication    | 142      | 11725108–11866966   |
| 3p26.3           | Duplication    | 821      | 35000–856000        |
| 3p26.3           | Duplication    | 487      | 2184248–2671032     |
| 3q21.3           | Deletion       | 22       | 127738922–127760706 |
| 3q21.3           | Deletion       | 22       | 127738922–127760706 |
| 3q26.2           | Duplication    | 101      | 169267735–169368109 |
| 4p13             | Duplication    | 319      | 43639658–43958804   |
| 4p16.1           | Duplication    | 542      | 9532281–10074307    |
| 4q21.23          | Duplication    | 225      | 87059036–87284649   |
| 4q25             | Deletion       | 81       | 114039979–114120494 |
| 4q28.1           | Duplication    | 526      | 123921769–124447711 |
| 4q28.2           | Duplication    | 79       | 129163803–129242884 |
| 4q31.23          | Duplication    | 131      | 149579044–149709797 |
| 4q35             | Duplication    | 331      | 185959445–186290124 |
| 4q35.2           | Duplication    | 711      | 190538660–191250145 |
| 5q31.2           | Duplication    | 703      | 137463806–138167611 |
| 6p22.1           | Duplication    | 230      | 28525866–28756292   |
| 6p22.1           | Deletion       | 51       | 28979234–29030730   |
| 6q11.1           | Duplication    | 833      | 63255005–64087608   |
| 6q16.1           | Deletion       | 959      | 92350077–93309199   |
| 6q21             | Duplication    | 482      | 106613439–107095209 |
| 6q25.1           | Deletion       | 30       | 151672213–151702033 |
| 7p14.1           | Duplication    | 235      | 39800516–40035332   |
| 7p14.3           | Duplication    | 54       | 33097553–33152539   |
| 7p14.3           | Duplication    | 55       | 33097553–33152539   |
| 7p14.3           | Duplication    | 54       | 33097553–33152539   |
| 7p14.3           | Duplication    | 55       | 33097553–33152539   |
| 7p14.3           | Duplication    | 55       | 33097553–33152539   |
| 7q11.23          | Duplication    | 181      | 75401774–75583095   |
| 7q22.1           | Duplication    | 448      | 99010883–99458579   |
| 7q22.3           | Deletion       | 83       | 106717466–106800374 |
| 7q31.1           | Deletion       | 172      | 109954612–110126676 |
| 7q33             | Deletion       | 256      | 133060000–133316000 |
| 7q34             | Duplication    | 118      | 140256549–140374477 |
| 7q36.1           | Deletion       | 52       | 151379435–151431158 |
| 8p11.23          | Deletion       | 59       | 39128088–39187859   |
| 8p12             | Duplication    | 101      | 38180851–38281364   |

**SUPPLEMENTAL TABLE 1** Continued

| Chromosome Locus | Type of Change | Size, kb | Coordinates (hg18)  |
|------------------|----------------|----------|---------------------|
| 8p12             | Deletion       | 446      | 32765436–33211412   |
| 8p22             | Deletion       | 45       | 13082460–13127459   |
| 8q13.2           | Duplication    | 180      | 68092487–68272431   |
| 8q21.11          | Deletion       | 266      | 75519142–75784892   |
| 8q21.2           | Duplication    | 202      | 86539379–86741780   |
| 9p13.2           | Deletion       | 70       | 37409265–37479345   |
| 9p21.3           | Duplication    | 298      | 20567062–20864718   |
| 9p22.1           | Deletion       | 133      | 19487546–19620612   |
| 9q31.1           | Duplication    | 700      | 102343259–103043117 |
| 9q31.1           | Deletion       | 412      | 103427543–103839936 |
| 9q31.3           | Duplication    | 53       | 113716789–113770103 |
| 9q34.11          | Duplication    | 52       | 129436056–129488906 |
| 9q34.2           | Duplication    | 75       | 135447994–135523489 |
| 9q34.2           | Duplication    | 285      | 136013220–136298049 |
| 10p13            | Deletion       | 563      | 16053444–16616223   |
| 10q11.21         | Duplication    | 129      | 42979015–43108175   |
| 10q21.1          | Duplication    | 264      | 58605000–58869000   |
| 10q22.2          | Deletion       | 411      | 75749022–76160342   |
| 10q22.2          | Deletion       | 59       | 74692636–74751408   |
| 10q23.1          | Duplication    | 1243     | 83661754–84904332   |
| 10q23.32         | Duplication    | 226      | 93685380–93911863   |
| 10q23.33         | Deletion       | 105      | 96967222–97072244   |
| 10q23.33         | Duplication    | 1146     | 95979398–97125811   |
| 10q23.33         | Deletion       | 114      | 96422729–96536271   |
| 11q21            | Duplication    | 190      | 95102950–95293406   |
| 11q22.3          | Duplication    | 499      | 104285169–104784882 |
| 11q25            | Duplication    | 172      | 133984000–134156378 |
| 12p11.21         | Duplication    | 50       | 32679281–32730005   |
| 12p11.21         | Duplication    | 50       | 32679281–32430005   |
| 12p11.23         | Duplication    | 482      | 27197587–27679748   |
| 13q12.11         | Duplication    | 26       | 19317333–19343320   |
| 13q12.11         | Duplication    | 371      | 18494397–18865488   |
| 13q21.2          | Duplication    | 1024     | 59327289–60351436   |
| 13q31.1          | Duplication    | 273      | 86073340–86346046   |
| 13q32.1          | Duplication    | 73       | 94741846–94814964   |
| 14q11.2          | Deletion       | 54       | 22294328–22347838   |
| 14q13.2          | Duplication    | 61       | 34280810–34341968   |
| 14q24.2          | Duplication    | 163      | 72478862–72641861   |
| 14q32.2          | Deletion       | 9        | 98250689–98259258   |
| 15q13.3          | Duplication    | 390      | 30935328–31325430   |
| 15q13.3          | Duplication    | 164      | 30080441–30244833   |
| 15q13.3          | Duplication    | 147      | 30083430–30230370   |
| 15q14            | Duplication    | 283      | 32873843–33156596   |
| 15q15.3          | Deletion       | 241      | 41610457–41851765   |
| 15q20.1          | Duplication    | 56       | 87963677–88019538   |
| 15q25            | Duplication    | 38       | 87936797–87975003   |
| 15q25.1          | Deletion       | 47       | 76841291–76888054   |
| 16p13.2          | Deletion       | 83       | 6883110–6966404     |
| 16p13.3          | Duplication    | 467      | 4226109–4693127     |
| 17p13.2          | Deletion       | 109      | 3882214–3991827     |
| 17p13.2–p13.1    | Deletion       | 104      | 6699298–6803080     |
| 17p13.3          | Duplication    | 486      | 1391616–1877367     |
| 17p13.3          | Duplication    | 400      | 879373–1280058      |
| 17q12            | Duplication    | 224      | 34737303–34961446   |
| 18p11.31–p11.23  | Duplication    | 485      | 7075833–7560888     |
| 18p11.32         | Deletion       | 66       | 170229–236407       |
| 18q21.2          | Duplication    | 73       | 46779898–46853028   |
| 18q23            | Duplication    | 419      | 75568996–75987923   |
| 19p12            | Deletion       | 276      | 21505820–21782094   |
| 20p12.1          | Duplication    | 415      | 13515931–13930996   |
| 20p12.3          | Duplication    | 43       | 8801003–8843935     |
| 20p13            | Deletion       | 30       | 4885202–4915563     |

**SUPPLEMENTAL TABLE 1** Continued

| Chromosome Locus | Type of Change | Size, kb | Coordinates (hg18)  |
|------------------|----------------|----------|---------------------|
| 20q11.22         | Duplication    | 57       | 33634683–33691704   |
| 20q13.32         | Deletion       | 22       | 57734633–57757317   |
| 21q22.3          | Duplication    | 81       | 42756544–42837739   |
| 21q22.3          | Duplication    | 139      | 42954140–43093465   |
| 22q11.21         | Duplication    | 87       | 19693064–19779911   |
| 22q12.2          | Duplication    | 125      | 29141060–29266316   |
| 22q12.2          | Duplication    | 67       | 29038245–29104867   |
| 22q12.33         | Duplication    | 88       | 34950270–35039172   |
| 22q13.1          | Deletion       | 339      | 37683612–3801900    |
| 22q13.2          | Deletion       | 97       | 39652724–39749329   |
| Xp11.22          | Duplication    | 1097     | 51614120–52710691   |
| Xp11.3           | Duplication    | 211      | 44706657–44917073   |
| Xp22.31          | Duplication    | 1628     | 6463313–8091810     |
| Xp22.31          | Duplication    | 235      | 6957788–7192761     |
| Xq12             | Deletion       | 284      | 65657077–65941741   |
| Xq12             | Duplication    | 186      | 65657077–65842988   |
| Xq21.31          | Deletion       | 217      | 87807468–88024116   |
| Xq22.33          | Deletion       | 141      | 18654–159978        |
| Xq27.3           | Deletion       | 120      | 144135904–144256200 |
| Yp11.2           | Deletion       | 287      | 6696721–6984030     |
| Yq11.221         | Duplication    | 166      | 15380259–15546437   |

**SUPPLEMENTAL TABLE 2** Copy-Number Variants

| Chromosome Locus | Type of Change | Size, kb | Coordinates (hg18)  |
|------------------|----------------|----------|---------------------|
| 1p31.1           | Deletion       | 284      | 79993406–80278245   |
| 1p33             | Duplication    | 210      | 47421885–47631217   |
| 1p33             | Deletion       | 66       | 49694563–49760722   |
| 1p33             | Deletion       | 66       | 49694563–49760722   |
| 1q31.1           | Duplication    | 438      | 187929481–188367054 |
| 1q31.1           | Deletion       | 102      | 185910650–186012380 |
| 1q42.12          | Duplication    | 96       | 223316944–223413657 |
| 1q42.13          | Deletion       | 100      | 224712357–224804494 |
| 1q44             | Duplication    | 742      | 246138090–246880909 |
| 2p16.2           | Duplication    | 127      | 54214268–54341696   |
| 2p16.3           | Duplication    | 297      | 51966666–52264129   |
| 2p16.3           | Deletion       | 108      | 51236317–51344921   |
| 2p16.3           | Deletion       | 65       | 50793646–50859380   |
| 2p16.3           | Deletion       | 173      | 52264070–52437533   |
| 2p22.3           | Duplication    | 682      | 32496047–33178943   |
| 2p25.3           | Deletion       | 160      | 74669–234175        |
| 2q11             | Duplication    | 68       | 99221389–99289230   |
| 2q13             | Deletion       | 60       | 110258768–110258827 |
| 2q22.1           | Deletion       | 199      | 140192516–140391809 |
| 2q32.3           | Deletion       | 159      | 194033989–194193963 |
| 2q34             | Deletion       | 134      | 213900382–214035255 |
| 2q34             | Deletion       | 134      | 213900382–214035255 |
| 2q37.1           | Deletion       | 72       | 230893123–230965712 |
| 2q37.3           | Duplication    | 81       | 241348104–241429332 |
| 2q37.33          | Deletion       | 171      | 242505261–242677125 |
| 3p24.2           | Duplication    | 128      | 25839402–25968376   |
| 3p24.3           | Duplication    | 269      | 22525732–22794743   |
| 3p25.1           | Duplication    | 97       | 12546448–12643905   |
| 3p25.1           | Duplication    | 149      | 12625788–12774925   |
| 3p26.3           | Duplication    | 570      | 832141–1402519      |
| 3q13.12          | Deletion       | 208      | 108148394–108356756 |
| 3q13.13          | Deletion       | 82       | 110332728–110414189 |
| 3q13.32          | Duplication    | 91       | 120209074–120300196 |
| 3q25.1           | Deletion       | 43       | 152985594–153029030 |
| 4p15.2           | Duplication    | 298      | 26669685–26967699   |
| 4q13.1           | Deletion       | —        | 64012685–64196454   |
| 4q13.2           | Duplication    | 37       | 70028556–70066323   |

**SUPPLEMENTAL TABLE 2** Continued

| Chromosome Locus | Type of Change | Size, kb | Coordinates (hg18)  |
|------------------|----------------|----------|---------------------|
| 4q28.3           | Deletion       | 213      | 135218818–135431839 |
| 4q28.3           | Deletion       | 236      | 135162686–135399619 |
| 4q31.23          | Deletion       | 133      | 150087315–150220194 |
| 4q32.1           | Duplication    | 27       | 156343823–156371627 |
| 4q32.3           | Duplication    | 51       | 165729958–165780335 |
| 4q33             | Deletion       | 82       | 171846140–171928407 |
| 4q35.2           | Duplication    | 355      | 188707151–189062658 |
| 4q35.2           | Duplication    | 589      | 189674197–190263604 |
| 5p14.3           | Deletion       | 94       | 20822596–20917015   |
| 5p15.2           | Deletion       | 47       | 12739815–12787149   |
| 5p15.2           | Deletion       | 48       | 12739815–12787149   |
| 5p15.2           | Deletion       | 421      | 12481203–12902583   |
| 5p15.31          | Deletion       | 155      | 7266329–7421002     |
| 5q12.1           | Duplication    | 56       | 59751869–59807133   |
| 5q12.1           | Duplication    | 56       | 59751869–59807133   |
| 5q13.2           | Deletion       | 277      | 152184917–152461926 |
| 5q13.2           | Duplication    | 26       | 71700589–71727409   |
| 5q14.2           | Duplication    | 242      | 81201023–81443539   |
| 5q21.1           | Deletion       | 441      | 97555112–97996776   |
| 5q35.2           | Duplication    | 51       | 177310142–177361603 |
| 6p12.1           | Duplication    | 31       | 57025567–57056653   |
| 6p12.1           | Duplication    | 31       | 57025567–57056653   |
| 6p22.2           | Deletion       | 108      | 23968001–24076225   |
| 6p25.1           | Deletion       | 208      | 4202390–4410302     |
| 6q14.1           | Duplication    | 177      | 81777831–81955185   |
| 6q16.3           | Duplication    | 349      | 100400517–100749562 |
| 6q24.1           | Deletion       | 240      | 140809155–141049958 |
| 6q26             | Duplication    | 332      | 162164490–162496284 |
| 6q26             | Deletion       | 537      | 162822273–163360150 |
| 6q27             | Duplication    | 237      | 168162397–168399768 |
| 6q27             | Duplication    | 240      | 168086690–168324061 |
| 6q36.11          | Duplication    | 82       | 109698258–109780892 |
| 7p15.3           | Deletion       | 79       | 19991112–20070362   |
| 7p21.11          | Deletion       | 152      | 19895481–20047718   |
| 7q11.21          | Duplication    | 558      | 64284236–64833882   |
| 7q11.21          | Deletion       | 496      | 64317152–64813826   |
| 7q11.23          | Duplication    | 489      | 75977218–76461345   |
| 7q22.1           | Duplication    | 159      | 100753847–100913113 |
| 7q31.31          | Deletion       | 147      | 118653907–118801848 |
| 7q31.33          | Deletion       | 675      | 124841815–125517460 |
| 7q31.33          | Deletion       | 22       | 124532475–124555093 |
| 7q31.33          | Deletion       | 22       | 124532475–124555093 |
| 7q34             | Deletion       | 64       | 142535965–142600790 |
| 7q35             | Duplication    | 528      | 143056351–143584405 |
| 7q36.3           | Deletion       | 229      | 158582792–158811327 |
| 8p11.1           | Duplication    | 590      | 43571445–43647122?? |
| 8p11.21          | Duplication    | 590      | 43057445–43647122   |
| 8p23.1           | Deletion       | 68       | 10997906–11066283   |
| 8q12.1           | Duplication    | 45       | 57215366–57260887   |
| 8q12.1           | Duplication    | 45       | 57215366–57260887   |
| 8q12.1           | Duplication    | 45       | 57215366–57260887   |
| 8q12.1           | Duplication    | 45       | 57215366–57260887   |
| 8q21.3           | Duplication    | 125      | 87244329–87369756   |
| 8q21.3           | Duplication    | 125      | 87244329–87369756   |
| 8q22.3           | Duplication    | 58       | 104597386–104655609 |
| 8q23.2           | Deletion       | 631      | 111851857–112483011 |
| 8q24.1           | Duplication    | 111      | 130477937–130589141 |
| 9p21.1           | Deletion       | 232      | 30392242–30624146   |
| 9p21.1           | Deletion       | 517      | 29908743–30425394   |
| 9p21.1           | Duplication    | 468      | 30490204–30958741   |
| 9p21.2           | Deletion       | 149      | 26264518–26413269   |
| 9p23             | Deletion       | 376      | 11971564–12347073   |
| 9p23             | Duplication    | 354      | 10776075–11130940   |

SUPPLEMENTAL TABLE 2 Continued

| Chromosome Locus | Type of Change | Size, kb | Coordinates (hg18)  |
|------------------|----------------|----------|---------------------|
| 9p24.3           | Deletion       | 198      | 1569467–1767542     |
| 9p24.3           | Deletion       | 50       | 194193–244712       |
| 9q21.31          | Duplication    | 168      | 80709888–80877058   |
| 9q34.3           | Duplication    | 157      | 137291390–137449079 |
| 10p11.21         | Duplication    | 112      | 44567691–44679097   |
| 10p12.1          | Deletion       | 92       | 27653437–27745932   |
| 10p14            | Deletion       | 125      | 9761044–9886913     |
| 10p15.3          | Deletion       | 106      | 2429525–2535161     |
| 10q11.21         | Duplication    | 112      | 44567691–44679097   |
| 10q11.21         | Duplication    | 124      | 44567691–44691321   |
| 10q11.21         | Duplication    | 124      | 44567691–44691321   |
| 10q11.21         | Duplication    | 112      | 44567691–44679097   |
| 10q21.1          | Duplication    | 467      | 56165984–56633390   |
| 10q21.1          | Deletion       | 65       | 56296177–56361367   |
| 10q21.1          | Deletion       | 65       | 56296177–56361367   |
| 10q25.1          | Duplication    | 800      | 109978403–110778833 |
| 10q25.1          | Duplication    | 192      | 107099052–107291781 |
| 10q27            | Duplication    | 330      | 133145614–133476839 |
| 11p11.12         | Duplication    | 137      | 51244490–51381967   |
| 11p12            | Deletion       | 365      | 39362743–39727938   |
| 11q11            | Duplication    | 148      | 55225136–55373795   |
| 11q11            | Deletion       | 82       | 55124730–55207364   |
| 11q14.1          | Deletion       | 93       | 81632029–81725288   |
| 11q14.2          | Duplication    | 320      | 86760405–87080566   |
| 11q25            | Duplication    | 35       | 134373558–134409273 |
| 11q25            | Duplication    | 472      | 133761059–134237689 |
| 11q25            | Duplication    | 357      | 133859024–134216882 |
| 12p12.3          | Duplication    | 132      | 19350942–19483375   |
| 12q13.13         | Duplication    | 22       | 49707910–49729183   |
| 12q24.12         | Duplication    | 142      | 110651926–110793312 |
| 12q24.12         | Duplication    | 125      | 110668504–110793312 |
| 13q12.11         | Duplication    | 26       | 19317333–19343320   |
| 13q12.2          | Duplication    | 715      | 22739623–23454108   |
| 13q21.1          | Deletion       | 112      | 54441320–54553418   |
| 13q21.2          | Duplication    | 143      | 58322410–58465138   |
| 13q21.31         | Duplication    | 119      | 61369549–61488488   |
| 13q21.32         | Deletion       | 118      | 65258536–65376868   |
| 13q31.3          | Duplication    | 60       | 89219673–89279955   |
| 13q32.1          | Duplication    | 69       | 96126817–96195296   |
| 14q12            | Deletion       | 188      | 27092217–27280779   |
| 14q21.1          | Deletion       | 239      | 40065729–40304402   |
| 14q21.2          | Duplication    | 366      | 40779816–41145260   |
| 14q21.2–q21.3    | Duplication    | 367      | 42926236–43293623   |
| 14q21.2–q21.3    | Deletion       | 1291     | 42778197–44069699   |
| 14q21.3          | Deletion       | 105      | 47856523–47961395   |
| 14q32.33         | Duplication    | 143      | 103864868–104007328 |
| 14q32.33         | Duplication    | 105      | 103741120–103846676 |
| 15q13.3          | Duplication    | 329      | 29885962–30214161   |
| 15q13.3          | Duplication    | 489      | 29809025–30298155   |
| 15q22.2          | Deletion       | 94       | 61018297–61113122   |
| 15q25.2          | Duplication    | 327      | 83616606–83943605   |
| 15q26.3          | Duplication    | 819      | 98251436–99070776   |
| 16p13.2          | Duplication    | 39       | 8941100–8980711     |
| 17p13.2          | Deletion       | 33       | 5683464–5716760     |
| 17p13.3          | Duplication    | 271      | 746560–1017867      |
| 17q12            | Duplication    | 43       | 31461588–31504608   |
| 18p11.31         | Duplication    | 425      | 4035292–4460508     |
| 18q12.3          | Duplication    | 357      | 36639472–36996954   |
| 18q21.1          | Deletion       | 55       | 44239262–44294629   |
| 18q21.2          | Deletion       | 231      | 49539385–49770946   |
| 18q22.1          | Deletion       | 143      | 63780172–63923394   |
| 18q22.1          | Duplication    | 126      | 60282237–60408993   |
| 18q22.1          | Duplication    | 836      | 63847444–64683523   |

**SUPPLEMENTAL TABLE 2** Continued

| Chromosome Locus | Type of Change | Size, kb | Coordinates (hg18)  |
|------------------|----------------|----------|---------------------|
| 19p              | Deletion       | 61       | 6909753–6970105     |
| 19q12            | Duplication    | 559      | 32964337–33405283   |
| 19q13.2          | Deletion       | 170      | 44828229–44998212   |
| 19q13.33         | Duplication    | 37       | 54593738–54630293   |
| 19q13.42         | Deletion       | 31       | 60745205–60776391   |
| 19q31.31         | Deletion       | 463      | 47986294–48449604   |
| 20p11.21         | Deletion       | 74       | 23675418–23749731   |
| 20p11.21         | Deletion       | 77       | 23653059–23730645   |
| 20p12.1          | Deletion       | 36       | 14633390–14669925   |
| 21q21.1          | Deletion       | 80       | 22349931–22429983   |
| 21q22.11         | Duplication    | 413      | 32028581–32441123   |
| 21q22.2          | Deletion       | 50       | 39284183–39334324   |
| 22q11.21         | Duplication    | 262      | 20643128–20904820   |
| 22q11.22         | Deletion       | 261      | 20643128–20904820   |
| 22q11.22         | Duplication    | 261      | 20643128–20904820   |
| 22q13.31         | Deletion       | 73       | 45579947–45653281   |
| 22q13.31–q13.33  | Deletion       | 264      | 45694378–45729440   |
| 22q13.33         | Deletion       | 68       | 48229988–48298677   |
| 22q13.33         | Deletion       | 80       | 48229988–48291943   |
| 22q13.33         | Deletion       | 62       | 48229988–48291943   |
| Xp11.3           | Duplication    | 40       | 46252456–46292633   |
| Xp11.4           | Duplication    | 192      | 37699655–37892051   |
| Xp21.1           | Duplication    | 112      | 33402422–33514518   |
| Xp22.31          | Duplication    | 549      | 7542546–8091810     |
| Xp22.31          | Duplication    | 125      | 8226181–8352011     |
| Xp22.31          | Duplication    | 254      | 7836967–8091810     |
| Xq12             | Deletion       | 35       | 65572252–65608045   |
| Xq13.3           | Deletion       | 54       | 74689105–74743044   |
| Xq21.33          | Duplication    | 53       | 96661202–96714326   |
| Xq22.3           | Duplication    | 61       | 105811010–105872847 |
| Xq24             | Duplication    | 188      | 119869413–120057907 |
| Xq25             | Deletion       | 36       | 124247248–124388478 |
| Xq28             | Duplication    | 16       | 153980689–153997205 |
| Xq28             | Duplication    | 712      | 153703704–154415469 |
| Yq11.221         | Duplication    | 19       | 14679579–14698135   |
